# Supplementary material for: Enhancement of thermal stability and energy storage capability of flexible Ag nanodot/polyimide nanocomposite filmsvia in situsynthesis
Source: Royal Society of Chemistry journal article supplement (doi:10.1039/d0tc02516j), 2020-01-01
Supplement: d0tc02516j1.pdf [file d0tc02516j1.pdf]

## Supporting Information

### Enhancement of Thermal Stability and Energy Storage Capability for Flexible Ag Nanodots/Polyimide Nanocomposite Films via In-situ Synthesis

Shuang Xing<sup>a</sup>, Zhongbin Pan<sup>\*a,b</sup>, Xiaofeng Wu<sup>a</sup>, Hanxi Chen<sup>a</sup>, Xujiao Lv<sup>a</sup>, Peng Li<sup>c</sup>,  
Jinjun Liu<sup>\*a</sup>, and Jiwei Zhai<sup>\*d</sup>

<sup>a</sup>School of Materials Science and Chemical Engineering, Ningbo University, Ningbo, Zhejiang, 315211, China. E-mail: panzhongbin@163.com (Zhongbin Pan), liujinjun1@nbu.edu.cn (Jinjun Liu)

<sup>b</sup>Key Laboratory of Engineering Dielectrics and Its Application, Ministry of Education, Harbin University of Science and Technology, Harbin, 150080, China.

<sup>c</sup>School of Materials Science and Engineering, Liaocheng University, Liaocheng 252059, China.

<sup>d</sup>School of Materials Science & Engineering, Tongji University, 4800 Caoan Road, Shanghai 201804, China. E-mail: apzhai@tongji.edu.cn (Jiwei Zhai)

## Supporting Information 1

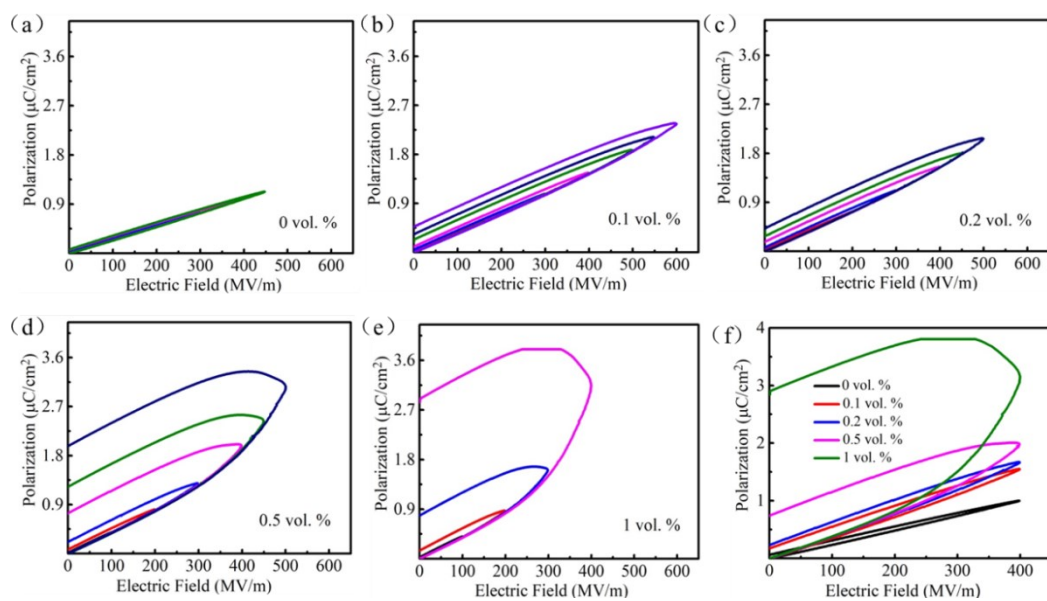

Figure S1 The unipolar  $D-E$  curves of nanocomposite films with different Ag-NDs contents at room temperature.

## Supporting Information 2

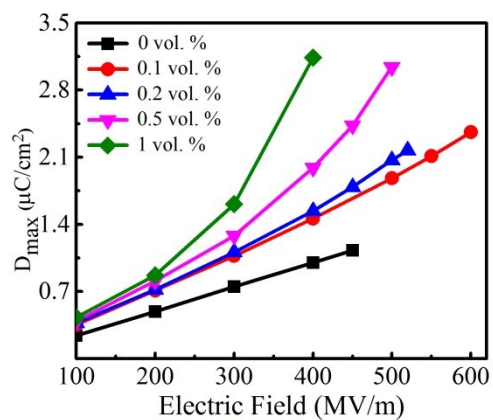

Figure S2 The  $D_{max}$  of pure PI and nanocomposite films with different concentrations of Ag-NDs.

### Supporting Information 3

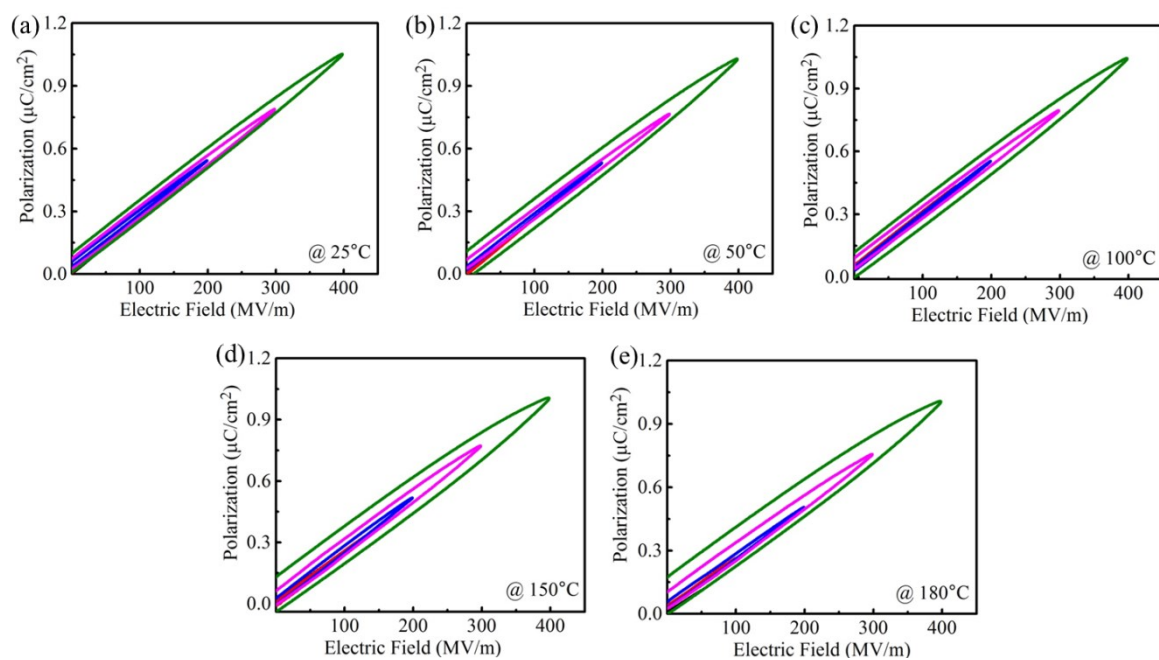

Figure S3 The unipolar  $D$ - $E$  loops of pure PI in the temperature range of 25 to 180°C at different applied electric field.

## Supporting Information 4

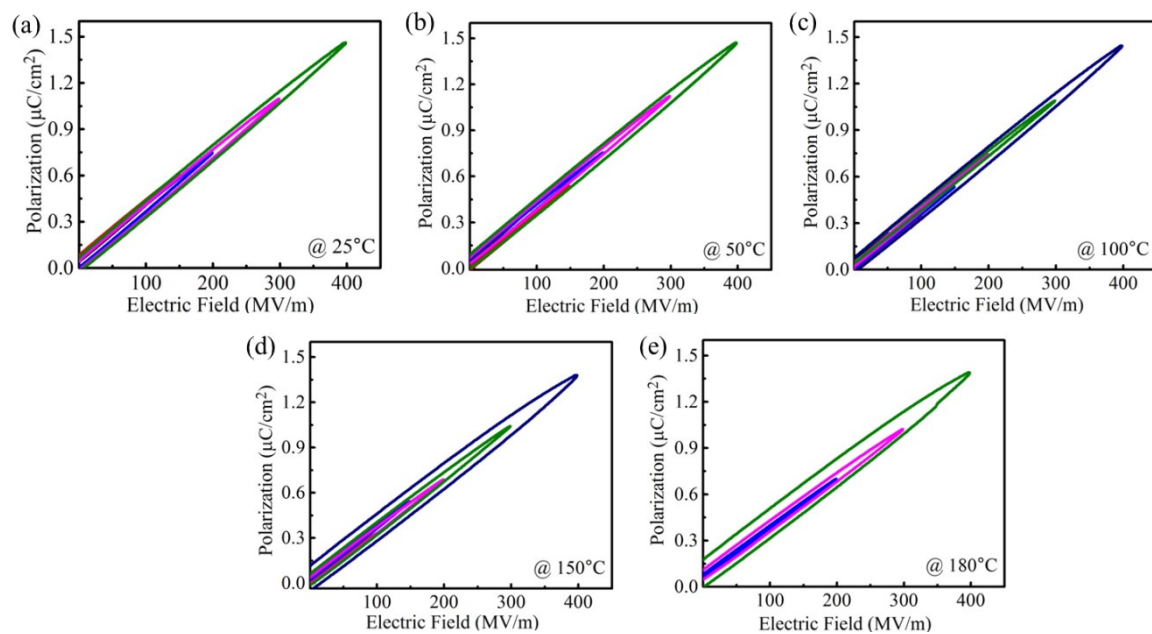

Figure S4 The unipolar  $D-E$  loops of 0.1 vol.% Ag-NDs/PI nanocomposite films in the temperature range of 25 to 180°C at different applied electric field.

## Supporting Information 5

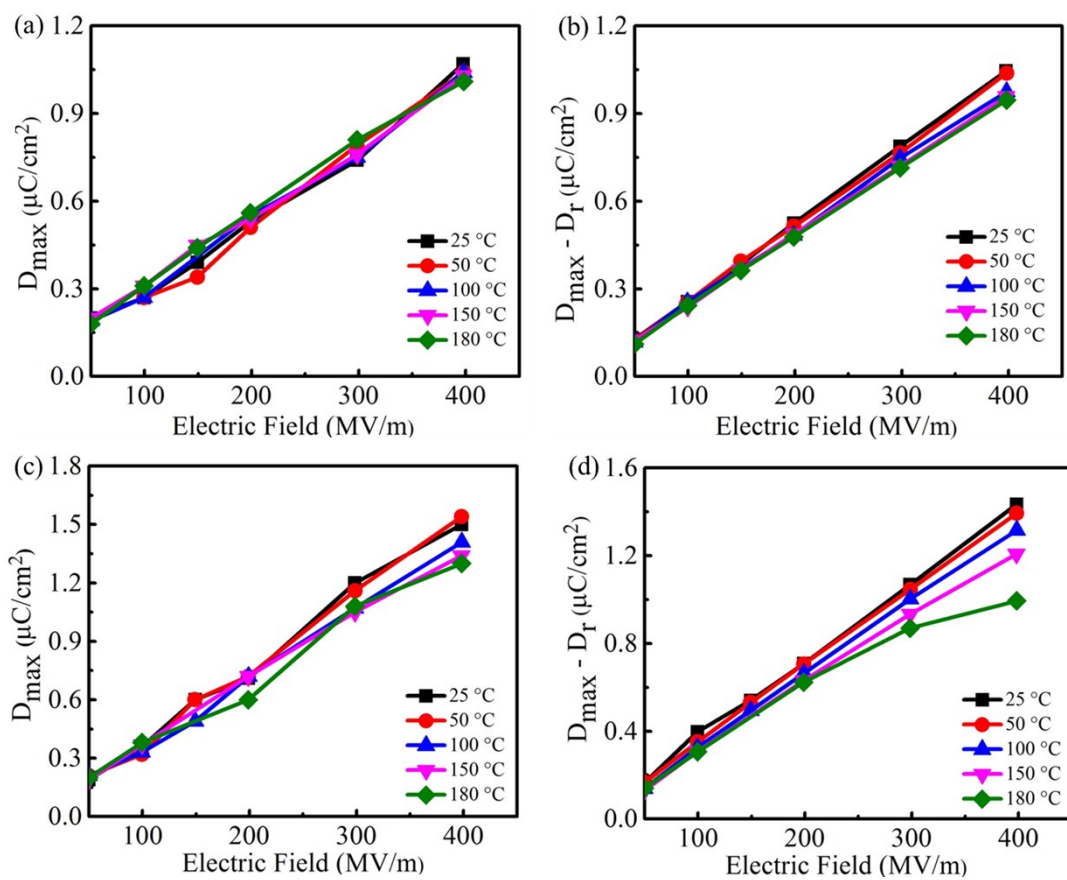

Figure S5 Pure PI and 0.1 vol.% Ag-NDs/PI nanocomposite films of (a), (c)  $D_{max}$ , and (b), (d)  $D_{max} - D_r$  in the temperature range of 25 to 180 °C at different applied field.
